# Supplementary material for: Surface modification of anatase nanoparticles with fused ring catecholate type ligands: a combined DFT and experimental study of optical properties
Source: Royal Society of Chemistry journal article supplement (doi:10.1039/c2nr11501h), 2012-01-01
Supplement: c2nr11501h.pdf [file c2nr11501h.pdf]

Supporting Information

**Surface Modification of Anatase Nanoparticles with Fused Ring  
Catecholate Type Ligands: A Combined DFT and Experimental  
Study of Optical Properties**

Tatjana D. Savić <sup>a</sup>, Ivana A. Janković <sup>a\*</sup>, Zoran V. Šaponjić <sup>a</sup>, Mirjana I. Čomor <sup>a</sup>,  
Dušan Ž. Veljković <sup>b</sup>, Snežana D. Zarić <sup>b</sup>, Jovan M. Nedeljković <sup>a</sup>

<sup>a</sup> University of Belgrade, Vinča Institute of Nuclear Sciences, P.O. Box 522, 11001  
Belgrade, Serbia

<sup>b</sup> Department of Chemistry, University of Belgrade, Studentski trg 16, P.O. Box 158,  
11001 Belgrade, Serbia

\* To whom correspondence should be addressed:

Ivana A. Janković

E-mail address: [ivanaj@vinca.rs](mailto:ivanaj@vinca.rs)

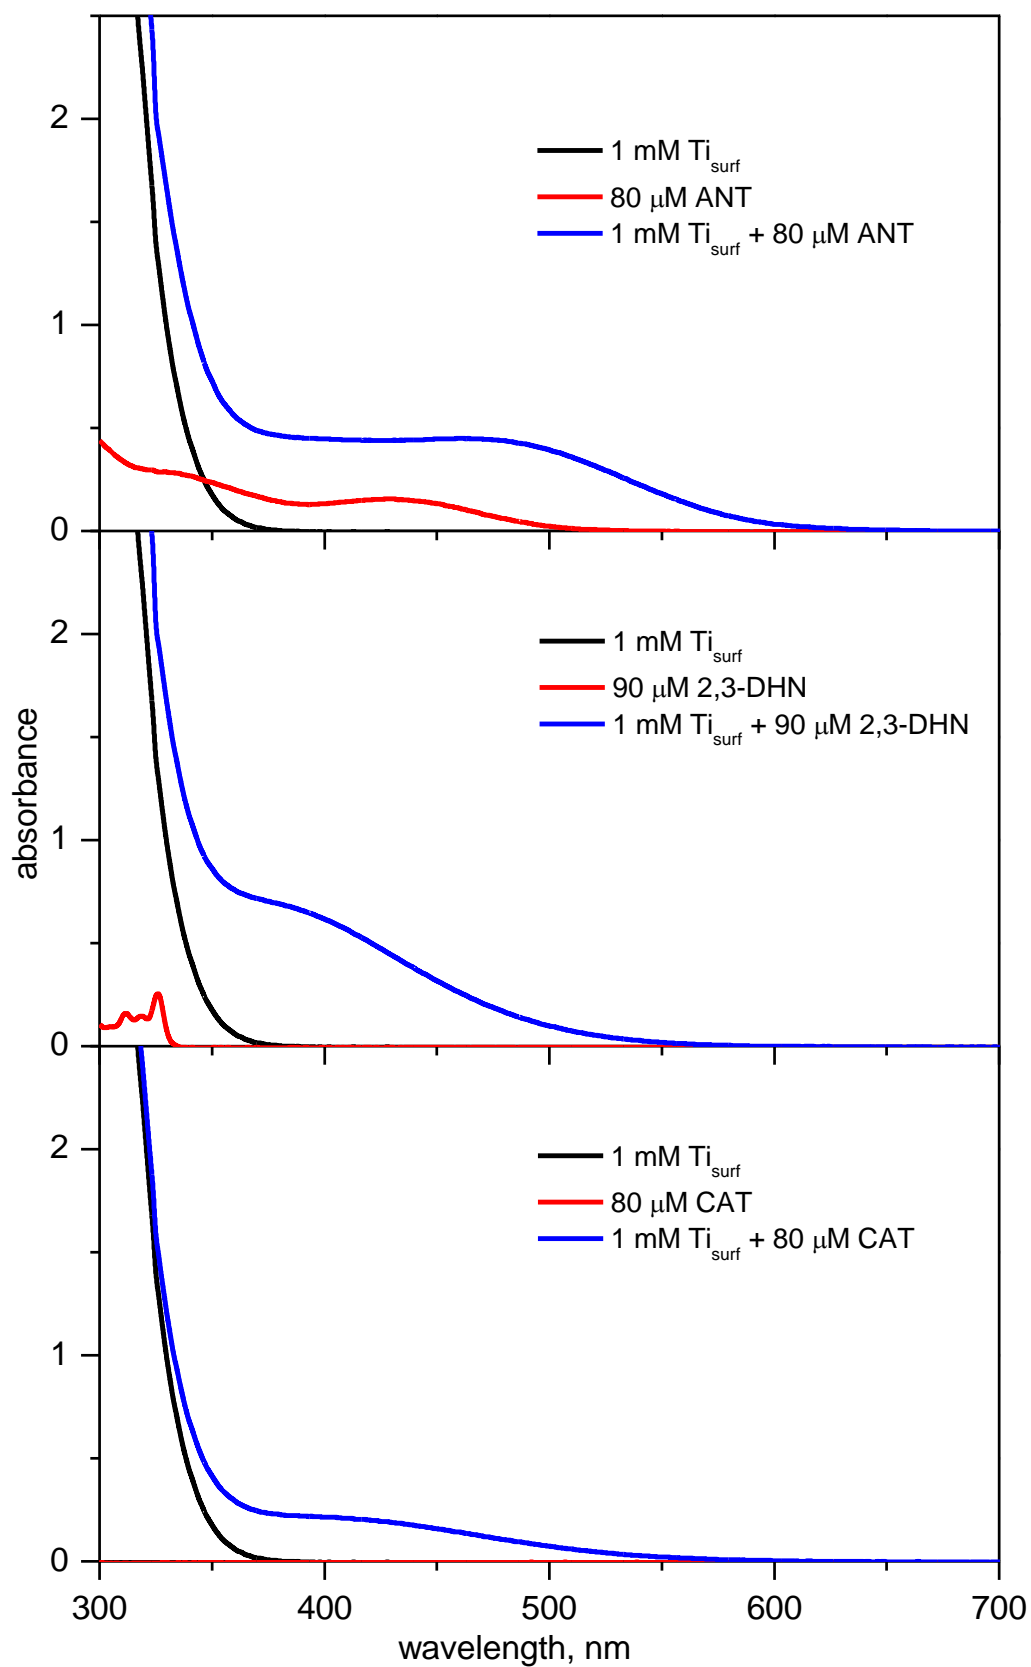

**Fig. S1** Absorption spectra of  $TiO_2$  nanoparticles (black), free ligands (red) and ligand- $TiO_2$  CT-complexes (blue) with 15% coverage in methanol/water=90/10, pH = 2.

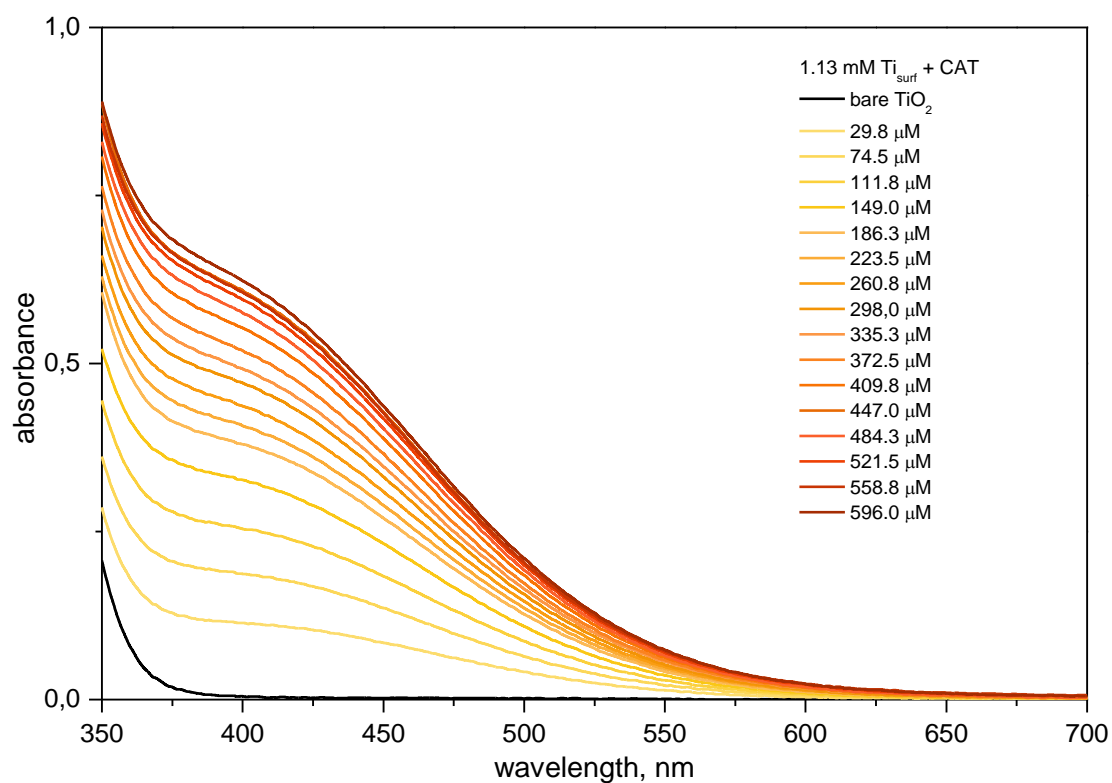

**Fig. S2** Absorption spectra of 4 mM TiO<sub>2</sub> nanoparticles before and after surface modification with catechol (0 – 0.6 mM in 0.04 mM steps) in methanol/water=90/10, pH = 2 (data recorded 20 h after surface modification).

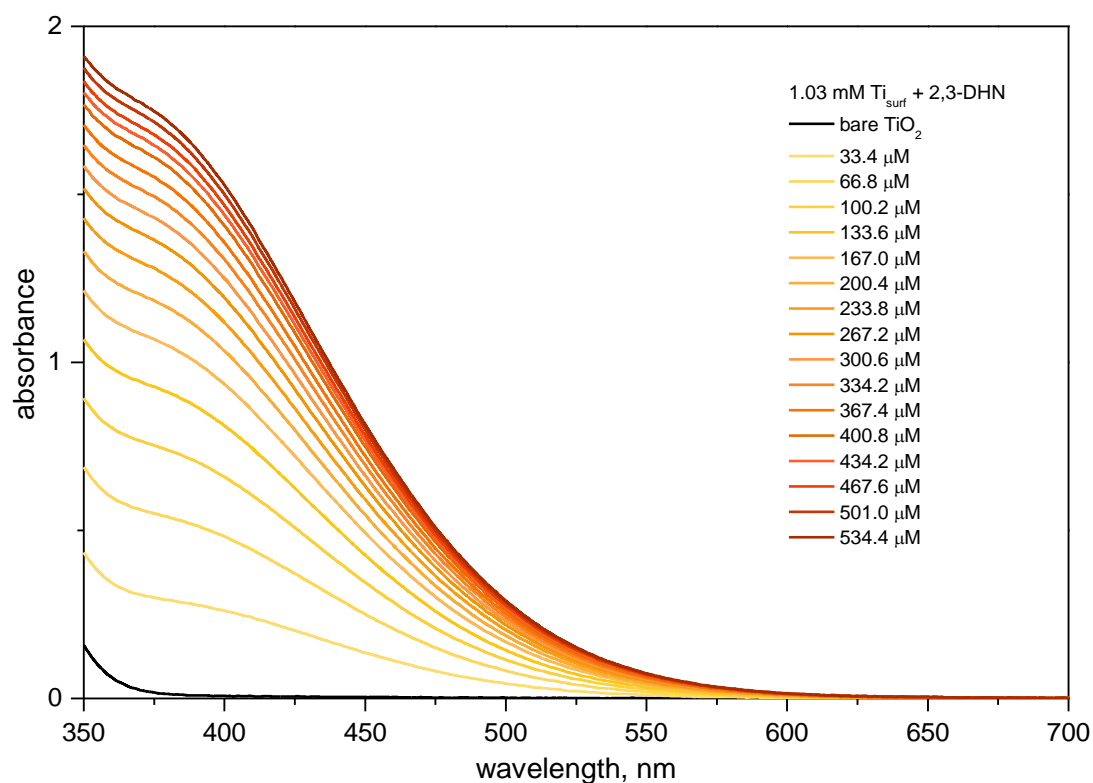

**Fig. S3** Absorption spectra of 4 mM TiO<sub>2</sub> nanoparticles before and after surface modification with 2,3-dihydroxynaphthalene (0 – 0.55 mM in 0.035 mM steps) in methanol/water=90/10, pH = 2 (data recorded 20 h after surface modification).

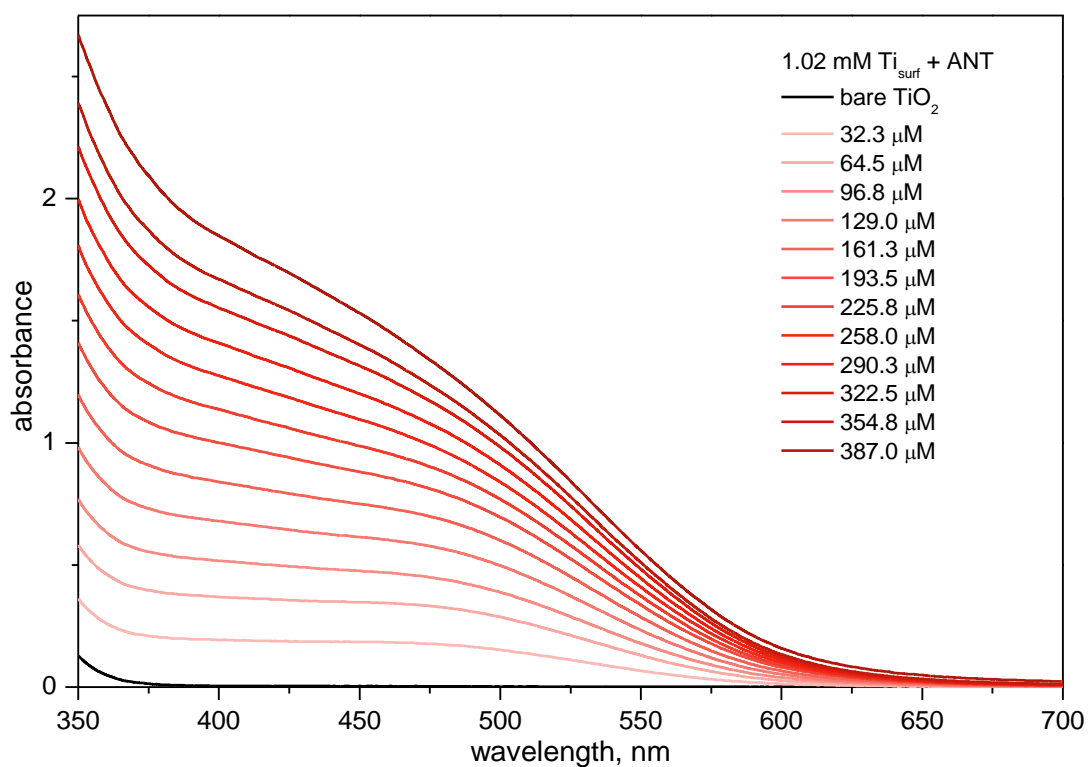

**Fig. S4** Absorption spectra of 4 mM TiO<sub>2</sub> nanoparticles before and after surface modification with anthrabin (0 – 0.4 mM in 0.035 mM steps) in methanol/water=90/10, pH = 2 (data recorded 20 h after surface modification).
